# Supplementary material for: Redox-Regulation of α-Globin in Vascular Physiology
Source: MDPI journal article supplement (doi:10.3390/antiox11010159), 2022-01-14
Supplement: s1 [file s1]

**Supplemental Table S1. Antibodies used in this study.**

| Antibody             | Type          | Concentration                                                | Supplier, reference no.                             |
|----------------------|---------------|--------------------------------------------------------------|-----------------------------------------------------|
| $\alpha$ -Globin     | Polyclonal    | 10 $\mu$ g/mL (histology)                                    | Abcam, Ab92492                                      |
| $\alpha$ -Globin     | Polyclonal    | (Western blot)                                               | Home-made                                           |
| eNOS                 | Monoclonal    | 1 $\mu$ g/mL (histology)<br>0.2 $\mu$ g/mL (Western blot)    | BD 610297                                           |
| CyB5a                | Polyclonal    | 4 $\mu$ g/mL (histology)<br>0.4 $\mu$ g/mL (Western blot)    | Proteintech, 12365-1-AP                             |
| CyB5b                | Polyclonal    | 2.5 $\mu$ g/mL (histology)<br>0.25 $\mu$ g/mL (Western blot) | Proteintech, 15469-1-AP                             |
| CyB5R3               | Polyclonal    | 0.4 $\mu$ g/mL (histology)<br>0.2 $\mu$ g/mL (Western blot)  | Proteintech, 10894-1-AP                             |
| Goat anti-rabbit IgG | HRP conjugate | 0.05 $\mu$ g/mL                                              | Jackson ImmunoResearch Laboratories,<br>111-035-003 |
| Goat anti-mouse IgG  | HRP conjugate | 0.05 $\mu$ g/mL                                              | Jackson ImmunoResearch Laboratories,<br>115-035-003 |

**Supplemental Table S2. Oligonucleotide primers used for RT-qPCR.**

| GENE          | ACCESSION    | FORWARD PRIMER, 5'→ 3' | REVERSE PRIMER, 5'→ 3' |
|---------------|--------------|------------------------|------------------------|
| <i>HBA</i>    | NM_008218    | GCTCTCTGGGGAAGACAAAA   | GCCGTGGCTTACATCAAAGT   |
| <i>HBB</i>    | NM_001278161 | TGTTGACTCACAACCCCAGA   | CTGGGTCCAAGGGTAGACAA   |
| <i>NOS3</i>   | NM_008713    | GCACCCAGAGCTTTTCTTTG   | GTCAACCGAACGAAGTGACA   |
| <i>CYB5A</i>  | NM_025797    | CTGGGTGATCCTGCATCATA   | ACAGTTCTCGTGCATCCGTA   |
| <i>CYB5B</i>  | NM_025558    | CTGCGATGAGAGGAGGAGAC   | CTCTGGCGGATGAAAGACTC   |
| <i>CYB5R3</i> | NM_029787    | GGAAGAGAGAGGGAGGGAGA   | GGCAGGTAGGTGGTTAGGTG   |
| <i>CYGB</i>   | NM_030206    | GAGTTGGGGTGAGTCAGCTT   | CCGTGGAGACCAGGTAGATG   |
| <i>ACTB</i>   | NM_007393    | CCATCTACGAGGGCTATGCT   | TTTGATGTACGCACGATTT    |

*HBA*,  $\alpha$ -globin; *HBB*,  $\beta$ -globin; *NOS3*, eNOS; *CYB5A*, cytochrome *b*<sub>5</sub> type A; *CYB5B*, cytochrome *b*<sub>5</sub> type B; *CYB5R3*, cytochrome *b*<sub>5</sub> reductase 3; *CYGB*, cytoglobin; *ACTB*,  $\beta$ -actin

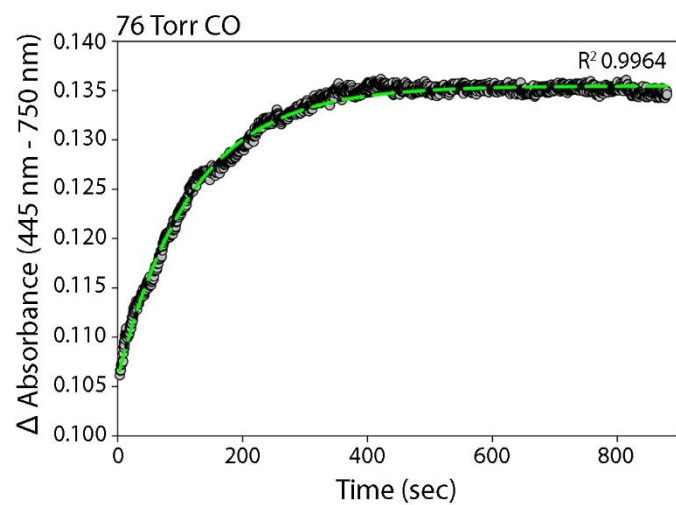

**Supplemental Figure S1. eNOS reduction.** eNOS reduction kinetics after mixing NADPH under 76 Torr of CO. The dashed lines represent the exponential rise fit, with the associated determination coefficient ( $R^2$ ).

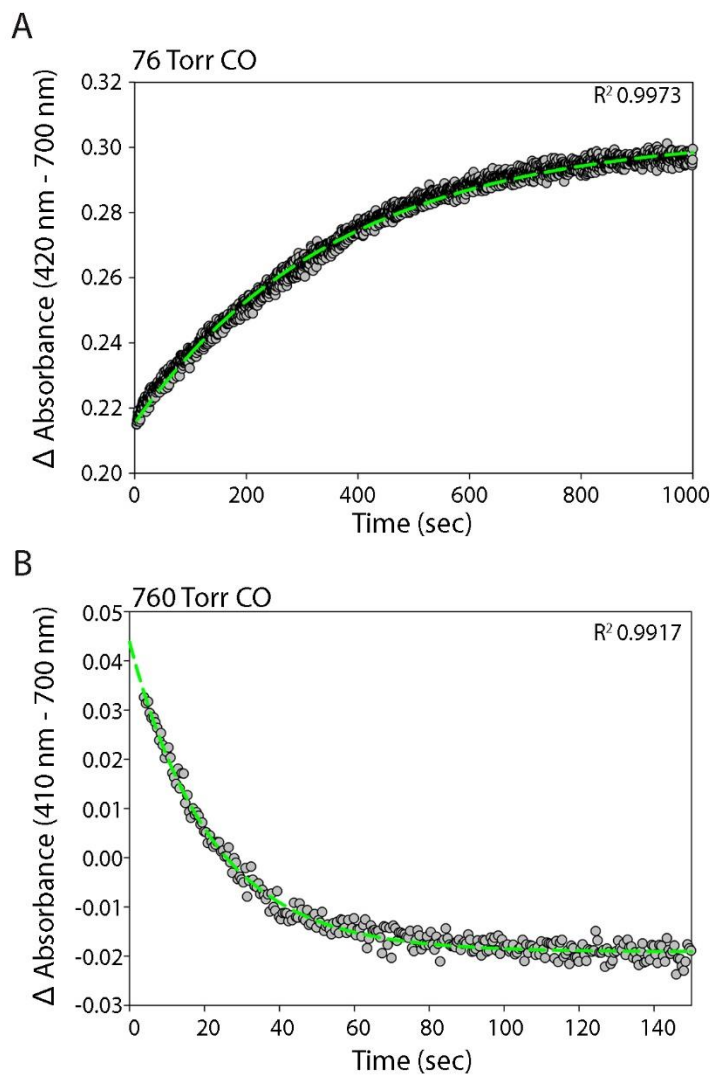

**Supplemental Figure S2.  $\alpha$ -Globin reduction.**  $\alpha$ -Globin-AHSP reduction kinetics, after mixing with CyB5R3/CyB5a (A) or eNOS (B) pre-incubated under anaerobic conditions in the presence of NADH or NADPH, respectively, under CO. The dashed lines represent the exponential rise or decay fits, with the associated determination coefficient ( $R^2$ ).
